# Supplementary material for: A Curious Novel Combination of Nucleophosmin (NPM1) Gene Mutations Leading to Aberrant Cytoplasmic Dislocation of NPM1 in Acute Myeloid Leukemia (AML)
Source: MDPI journal article supplement (doi:10.3390/genes12091426), 2021-09-16
Supplement: s1 [file s1]

**Table S1. Genes subjected to targeted deep sequencing**

**(QIAseq Targeted DNA Custom panel-QIAGEN (CDHS-31667Z-1041))**

| Gene           | Target (exon) | Gene            | Target (exon)      | Gene          | Target (exon)  | Gene         | Target (exon) |
|----------------|---------------|-----------------|--------------------|---------------|----------------|--------------|---------------|
| <b>ANKRD26</b> | 5'utr         | <b>ETV6/TEL</b> | 1-8                | <b>KRAS</b>   | 2, 3           | <b>SF3B1</b> | 13-16         |
| <b>ASXL1</b>   | 12            | <b>EZH2</b>     | All exons          | <b>MBD4</b>   | 1-8            | <b>SMC1A</b> | 2, 11, 16, 17 |
| <b>BCOR</b>    | All exons     | <b>FLT3</b>     | 14,15,20           | <b>MPL</b>    | 10             | <b>SRSF2</b> | 1             |
| <b>BCORL1</b>  | All exons     | <b>GATA1</b>    | 2                  | <b>NPM1</b>   | 12             | <b>STAG2</b> | All exons     |
| <b>BRAF</b>    | 15            | <b>GATA2</b>    | 4-6                | <b>NRAS</b>   | 2, 3           | <b>TET2</b>  | 3-11          |
| <b>CALR</b>    | 9             | <b>HRAS</b>     | 2, 3               | <b>PHF6</b>   | All exons      | <b>TP53</b>  | 2-11          |
| <b>CBL</b>     | 8-9           | <b>IDH1</b>     | 4                  | <b>PPM1D</b>  | 5-6            | <b>U2AF1</b> | 2, 6          |
| <b>CEBPA</b>   | All exons     | <b>IDH2</b>     | 4                  | <b>PTPN11</b> | 3, 13          | <b>WT1</b>   | 7,9           |
| <b>CSF3R</b>   | 10,14-18      | <b>JAK2</b>     | 12, 14             | <b>RAD21</b>  | All exons      | <b>ZRSR2</b> | All exons     |
| <b>DDX41</b>   | 5,17          | <b>JAK3</b>     | 13                 | <b>RUNX1</b>  | 1-6            |              |               |
| <b>DNMT3A</b>  | All exons     | <b>KIT</b>      | 2, 8-11,<br>13, 17 | <b>SETBP1</b> | 4<br>(partial) |              |               |

**Table S2. List of somatic mutations by barcoded-targeted NGS of myeloid recurrent genes in peripheral blood of AML patient Rm.**

| Gene         | Chr | Coordinate | HGVS coding sequence name                | HGVS protein sequence name        | Variant type | Variant allele frequency (%) | Unique Variant coverage depth |
|--------------|-----|------------|------------------------------------------|-----------------------------------|--------------|------------------------------|-------------------------------|
| <i>SRSF2</i> | 17  | 74732959   | NM_003016.4:c.284C>G                     | NP_003007.2:p.Pro95Arg            | missense     | 50.2                         | 510                           |
| <i>TET2</i>  | 4   | 106157477  | NM_001127208.2:c.2379_2385delATCAAGC     | NP_001120680.1:p.Glu796ArgfsTer15 | frameshift   | 47.2                         | 688                           |
| <i>NPM1</i>  | 5   | 170837562  | NM_002520.6:c.879_*1delTCTTTAAG          | NP_002511.1:p.Leu294Lys           | frameshift   | 20.5                         | 108                           |
| <i>NPM1</i>  | 5   | 170837543  | NM_002520.6:c.859_860insTCTG             | NP_002511.1:p.Trp288CysfsTer12    | frameshift   | 16.1                         | 80                            |
| <i>ASXL1</i> | 20  | 31024010   | NM_015338.5:c.3497_3510delGCCCCAGTTCTTTA | NP_056153.2:p.Ser1166LysfsTer11   | frameshift   | 8.7                          | 104                           |
